# Supplementary material
Source: PubMed Central journal article supplement (PMC4643831)
Supplement: NIHMS716459-supplement-Appendix.pdf [file NIHMS716459-supplement-Appendix.pdf]

Appendix Table 1. Characteristics of cART initiators by CD4 cell count at cART initiation, HIV-CAUSAL Collaboration 2000-2013.

| Characteristics at HIV diagnosis, N (%) | CD4 cell count at cART initiation   |                                      |
|-----------------------------------------|-------------------------------------|--------------------------------------|
|                                         | ≥500 cells/mm <sup>3</sup> (N=3594) | <500 cells/mm <sup>3</sup> (N=36123) |
| Calendar year, median [IQR]             | 2007 [2003,2009]                    | 2006 [2003,2008]                     |
| Age, median [IQR]                       | 35 [28,44]                          | 38 [31,46]                           |
| Sex                                     |                                     |                                      |
| Male                                    | 2810 (78%)                          | 27432 (76%)                          |
| Female                                  | 784 (22%)                           | 8691 (24%)                           |
| Transmission group                      |                                     |                                      |
| Heterosexual                            | 1091 (30%)                          | 14395 (40%)                          |
| Homo/bisexual                           | 2016 (56%)                          | 15745 (44%)                          |
| Injecting drug use                      | 76 (2%)                             | 926 (3%)                             |
| Other/unknown                           | 411 (11%)                           | 5046 (14%)                           |
| Geographical origin                     |                                     |                                      |
| Western countries                       | 2796 (78%)                          | 24084 (67%)                          |
| Sub-saharan Africa                      | 401 (11%)                           | 7067 (20%)                           |
| Rest of the world                       | 271 (8%)                            | 3310 (9%)                            |
| Unknown                                 | 126 (4%)                            | 1653 (5%)                            |
| AIDS before cART initiation             | 76(2%)                              | 792 (2%)                             |

Appendix Table 2. Sensitivity analyses: Mortality risk ratios by cART initiation strategy, HIV-CAUSAL Collaboration 2000-2013.

| <b>cART initiation strategy</b> | <b>Adjusting for Hepatitis C Virus co-infection</b> | <b>Including individuals with no CD4 or HIV-RNA after baseline</b> | <b>Excluding the seroconverters cohorts</b> |
|---------------------------------|-----------------------------------------------------|--------------------------------------------------------------------|---------------------------------------------|
| Immediate universal             | 1 (ref.)                                            | 1 (ref.)                                                           | 1 (ref.)                                    |
| <500 cells/mm <sup>3</sup>      | 1.03 (1.01,1.04)                                    | 1.02 (1.00,1.02)                                                   | 1.02 (1.01,1.03)                            |
| <350 cells/mm <sup>3</sup>      | 1.09 (1.05,1.14)                                    | 1.06 (1.04,1.08)                                                   | 1.06 (1.04,1.10)                            |

Appendix Table 3. Proportion (%) in need of antiretroviral treatment (95% confidence interval)\*. HIV-CAUSAL Collaboration 2000-2013.

| cART initiation strategy      | 1 year |              | 2 years |              |      | 5 years      |      |              | 7 years |              |  |
|-------------------------------|--------|--------------|---------|--------------|------|--------------|------|--------------|---------|--------------|--|
| Immediate universal           | 100    | (100, 100)   | 100     | (100, 100)   | 100  | (100, 100)   | 100  | (100, 100)   | 100     | (100, 100)   |  |
| CD4<500 cells/mm <sup>3</sup> | 77.9   | (77.8, 78.3) | 87.3    | (87.2, 87.7) | 97.2 | (97.0, 97.3) | 98.7 | (98.6, 98.7) | 98.7    | (98.6, 98.7) |  |
| CD4<350 cells/mm <sup>3</sup> | 57.7   | (57.3, 58.2) | 69.9    | (65.5, 70.2) | 88.3 | (87.7, 88.5) | 92.6 | (92.2, 92.9) | 92.6    | (92.2, 92.9) |  |

\*Estimates based on the parametric g-formula adjusted for measured time-varying confounders (CD4 count, HIV-RNA and AIDS) and baseline characteristics (calendar period and age of HIV diagnosis, risk group, gender, geographical origin, ethnicity and cohort).

Appendix Table 4. Proportion with suppressed virological replication (<50 copies/mL) (95% confidence interval)\*. HIV-CAUSAL Collaboration 2000-2013.

| cART initiation strategy      | 1 year |              | 2 years |              | 5 years |              | 7 years |              |
|-------------------------------|--------|--------------|---------|--------------|---------|--------------|---------|--------------|
| Immediate universal           | 57.5   | (57.1, 58.1) | 81.8    | (81.5, 82.5) | 85.8    | (85.4, 86.4) | 87.3    | (87.3, 88.6) |
| CD4<500 cells/mm <sup>3</sup> | 45.6   | (45.5, 46.2) | 67.8    | (67.5, 68.3) | 83.8    | (83.5, 84.4) | 87.4    | (87.4, 88.6) |
| CD4<350 cells/mm <sup>3</sup> | 35.5   | (35.5, 36.0) | 53.0    | (52.4, 53.5) | 76.4    | (76.1, 77.0) | 83.8    | (83.6, 84.9) |

\*Estimates based on the parametric g-formula adjusted for measured time-varying confounders (CD4 count, HIV-RNA and AIDS) and baseline characteristics (calendar period and age of HIV diagnosis, risk group, gender, geographical origin, ethnicity and cohort).

Appendix Figure 1. Mean of the main study variables: observed (solid line) and estimated via the parametric g-formula (dotted line)  
HIV-CAUSAL Collaboration 2000-2013.

|                    |                    |                    |
|--------------------|--------------------|--------------------|
| Appendix Figure 1a | Appendix Figure 1b | Appendix Figure 1c |
| Appendix Figure 1d | Appendix Figure 1d | Appendix Figure 1e |

Appendix Figure 2. Proportion of individuals with suppressed virological replication, defined as HIV-RNA<400 copies/mL by cART initiation strategy. HIV-CAUSAL Collaboration 2000-2013
